# Supplementary material for: Warm and Wet Autumns Favour Yield Losses of Oilseed Rape Caused by Phoma Stem Canker
Source: MDPI journal article supplement (doi:10.3390/agronomy11061171), 2021-06-08
Supplement: s1 [file s1]

**Table S1.** Meteorological data at experiment site in Glubczyce (N 50°12'0.339". E 17°49'45.552"), Opole Region, Poland

| Week after the start of fungicide applications | Mean temperature [°C] | Mean of the highest temperatures [°C] | The highest temperature [°C] | Mean of the lowest temperatures [°C] | The lowest temperature [°C] | Sum of rainfall [mm] |
|------------------------------------------------|-----------------------|---------------------------------------|------------------------------|--------------------------------------|-----------------------------|----------------------|
| <b>2009</b>                                    |                       |                                       |                              |                                      |                             |                      |
| 1                                              | 12.01                 | 17.99                                 | 25.00                        | 7.33                                 | 3.10                        | 7.00                 |
| 2                                              | 6.66                  | 9.90                                  | 15.20                        | 3.46                                 | 0.90                        | 47.00                |
| 3                                              | 3.34                  | 6.21                                  | 9.90                         | 0.95                                 | -0.80                       | 20.90                |
| 4                                              | 7.24                  | 10.66                                 | 13.40                        | 4.63                                 | 2.90                        | 15.90                |
| 5                                              | 1.16                  | 4.63                                  | 7.20                         | -2.03                                | -5.60                       | 1.10                 |
| 6                                              | 3.98                  | 7.15                                  | 10.20                        | 1.14                                 | -0.80                       | 40.30                |
| 7                                              | 8.28                  | 13.87                                 | 14.70                        | 4.73                                 | 1.40                        | 1.40                 |
| 8                                              | 7.39                  | 12.84                                 | 16.20                        | 3.49                                 | 7.5                         | 1.50                 |
| <b>2010</b>                                    |                       |                                       |                              |                                      |                             |                      |
| 1                                              | 10.09                 | 14.11                                 | 23.20                        | 6.90                                 | 0.90                        | 56.70                |
| 2                                              | 8.88                  | 14.87                                 | 17.20                        | 4.33                                 | -0.60                       | 0.00                 |
| 3                                              | 4.06                  | 9.93                                  | 13.40                        | -0.44                                | -2.30                       | 0.00                 |
| 4                                              | 4.75                  | 8.55                                  | 11.20                        | 1.39                                 | -0.60                       | 1.80                 |
| 5                                              | 4.80                  | 10.14                                 | 14.30                        | 1.09                                 | -1.90                       | 0.80                 |
| 6                                              | 10.30                 | 16.03                                 | 17.70                        | 5.25                                 | -2.30                       | 0.00                 |
| 7                                              | 8.90                  | 11.89                                 | 18.20                        | 6.41                                 | 4.70                        | 30.90                |
| 8                                              | 8.63                  | 11.93                                 | 16.90                        | 5.93                                 | 2.20                        | 13.50                |
| <b>2011</b>                                    |                       |                                       |                              |                                      |                             |                      |
| 1                                              | 14.39                 | 24.08                                 | 26.20                        | 8.20                                 | 5.30                        | 1.60                 |
| 2                                              | 10.57                 | 15.06                                 | 20.70                        | 6.97                                 | 1.80                        | 27.10                |
| 3                                              | 6.14                  | 6.77                                  | 12.80                        | 2.41                                 | -3.10                       | 5.40                 |
| 4                                              | 4.38                  | 8.77                                  | 9.90                         | 0.52                                 | -2.50                       | 6.00                 |
| 5                                              | 7.95                  | 13.55                                 | 15.20                        | 4.29                                 | 2.20                        | 0.00                 |
| 6                                              | 7.22                  | 15.45                                 | 17.70                        | 0.77                                 | -1.80                       | 0.00                 |
| 7                                              | 1.04                  | 6.41                                  | 15.80                        | -2.58                                | -5.90                       | 0.00                 |
| 8                                              | 0.37                  | 4.07                                  | 8.10                         | -3.63                                | -7.00                       | 0.00                 |
| <b>2012</b>                                    |                       |                                       |                              |                                      |                             |                      |
| 1                                              | 11.31                 | 18.20                                 | 23.00                        | 8.05                                 | 1.70                        | 7.80                 |
| 2                                              | 14.59                 | 20.70                                 | 23.90                        | 9.48                                 | 5.70                        | 2.70                 |
| 3                                              | 11.59                 | 18.21                                 | 22.90                        | 7.51                                 | 4.50                        | 27.60                |
| 4                                              | 7.94                  | 14.31                                 | 18.10                        | 3.23                                 | -1.90                       | 10.30                |
| 5                                              | 9.48                  | 15.33                                 | 21.90                        | 6.06                                 | 3.30                        | 16.20                |
| 6                                              | 2.27                  | 5.17                                  | 11.10                        | 0.07                                 | -6.00                       | 32.10                |
| 7                                              | 6.53                  | 10.24                                 | 13.40                        | 3.54                                 | 1.60                        | 31.50                |
| 8                                              | 6.78                  | 11.23                                 | 15.50                        | 3.26                                 | -1.40                       | 0.80                 |

**Table S2.** Meteorological data at experiment site in Toszek (N 50°27'18.383". E 18°31'5.017), Opole Region, Poland

| Week after the start<br>of fungicide<br>applications | Mean<br>temperature<br>[°C] | Mean of the<br>highest<br>temperatures<br>[°C] | The highest<br>temperature<br>[°C] | Mean of the<br>lowest<br>temperatures<br>[°C] | The lowest<br>temperature<br>[°C] | Sum of<br>rainfall<br>[mm] |
|------------------------------------------------------|-----------------------------|------------------------------------------------|------------------------------------|-----------------------------------------------|-----------------------------------|----------------------------|
| <b>2009</b>                                          |                             |                                                |                                    |                                               |                                   |                            |
| 1                                                    | 10.14                       | 14.77                                          | 17.50                              | 6.64                                          | 4.70                              | 13.30                      |
| 2                                                    | 8.62                        | 12.40                                          | 22.90                              | 6.51                                          | 0.30                              | 52.80                      |
| 3                                                    | 4.21                        | 7.33                                           | 10.70                              | 2.30                                          | 0.30                              | 20.80                      |
| 4                                                    | 6.46                        | 9.72                                           | 13.20                              | 4.49                                          | 0.20                              | 12.60                      |
| 5                                                    | 1.60                        | 6.48                                           | 9.70                               | -1.17                                         | -3.80                             | 14.60                      |
| 6                                                    | 5.23                        | 7.13                                           | 9.10                               | 3.83                                          | 0.20                              | 36.30                      |
| 7                                                    | 7.70                        | 12.35                                          | 14.20                              | 4.98                                          | 2.20                              | 1.10                       |
| 8                                                    | 7.94                        | 12.31                                          | 13.90                              | 5.26                                          | 0.50                              | 3.60                       |
| <b>2010</b>                                          |                             |                                                |                                    |                                               |                                   |                            |
| 1                                                    | 11.89                       | 16.35                                          | 23.70                              | 9.20                                          | 4.50                              | 54.80                      |
| 2                                                    | 8.49                        | 13.86                                          | 16.70                              | 4.87                                          | 2.30                              | 7.30                       |
| 3                                                    | 4.53                        | 10.14                                          | 14.20                              | 0.54                                          | -1.40                             | 0.00                       |
| 4                                                    | 5.37                        | 8.40                                           | 10.10                              | 3.30                                          | 0.30                              | 2.50                       |
| 5                                                    | 4.77                        | 9.54                                           | 12.20                              | 1.49                                          | -2.50                             | 0.80                       |
| 6                                                    | 9.71                        | 15.78                                          | 18.20                              | 5.41                                          | -0.30                             | 1.70                       |
| 7                                                    | 8.16                        | 11.73                                          | 14.70                              | 6.30                                          | 3.30                              | 31.70                      |
| 8                                                    | 9.26                        | 12.56                                          | 16.70                              | 7.21                                          | 5.40                              | 12.60                      |
| <b>2011</b>                                          |                             |                                                |                                    |                                               |                                   |                            |
| 1                                                    | 14.35                       | 21.83                                          | 23.70                              | 6.87                                          | 3.30                              | 2.20                       |
| 2                                                    | 17.12                       | 22.78                                          | 24.70                              | 11.45                                         | 8.00                              | 7.00                       |
| 3                                                    | 9.13                        | 13.03                                          | 17.70                              | 5.24                                          | 1.20                              | 18.40                      |
| 4                                                    | 6.42                        | 10.67                                          | 12.20                              | 2.17                                          | -1.50                             | 2.70                       |
| 5                                                    | 7.46                        | 11.06                                          | 15.70                              | 3.86                                          | -1.60                             | 1.90                       |
| 6                                                    | 8.94                        | 14.41                                          | 15.90                              | 3.46                                          | -0.30                             | 0.00                       |
| 7                                                    | 8.14                        | 13.96                                          | 16.90                              | 2.33                                          | -1.30                             | 0.00                       |
| 8                                                    | 0.94                        | 4.86                                           | 8.80                               | -2.47                                         | -4.50                             | 0.00                       |
| <b>2012</b>                                          |                             |                                                |                                    |                                               |                                   |                            |
| 1                                                    | 13.98                       | 19.09                                          | 24.00                              | 8.86                                          | 1.00                              | 0.50                       |
| 2                                                    | 15.72                       | 20.70                                          | 21.70                              | 10.73                                         | 6.00                              | 5.90                       |
| 3                                                    | 12.41                       | 17.84                                          | 22.30                              | 6.97                                          | 1.40                              | 24.60                      |
| 4                                                    | 9.70                        | 13.96                                          | 17.60                              | 5.44                                          | -1.00                             | 3.50                       |
| 5                                                    | 11.65                       | 16.38                                          | 20.00                              | 6.92                                          | 4.80                              | 27.80                      |
| 6                                                    | 2.53                        | 4.35                                           | 9.80                               | 0.72                                          | -2.20                             | 24.70                      |
| 7                                                    | 7.12                        | 9.98                                           | 12.10                              | 4.25                                          | 2.50                              | 32.57                      |
| 8                                                    | 6.11                        | 9.46                                           | 15.20                              | 2.76                                          | -1.80                             | 2.90                       |

**Table S3.** Spearman's rank correlation coefficients between the incidence and severity of phoma leaf spotting (autumn) and stem canker (summer) symptoms and seed yield of winter oilseed rape for the data obtained at Glubczyce and Toszek experimental sites, Opole Region, Poland

| Parameters                             | Glubczyce               |                              |            | Toszek                  |                              |            |
|----------------------------------------|-------------------------|------------------------------|------------|-------------------------|------------------------------|------------|
|                                        | Severity                |                              | Seed yield | Severity                |                              | Seed yield |
|                                        | All plants <sup>4</sup> | Infected plants <sup>5</sup> |            | All plants <sup>4</sup> | Infected plants <sup>5</sup> |            |
| Autumn 2009                            |                         |                              |            |                         |                              |            |
| Phoma leaf spot incidence <sup>1</sup> | 0.48                    | 0.41                         | -0.40      | 0.56                    | 0.69                         | -0.69      |
| Phoma leaf spot severity <sup>2</sup>  |                         |                              | -0.89      |                         |                              | -0.93      |
| Autumn 2010                            |                         |                              |            |                         |                              |            |
| Phoma leaf spot incidence              | 0.71                    | 0.64                         | -0.21      | 0.61                    | 0.58                         | -0.46      |
| Phoma leaf spot severity               |                         |                              | -0.88      |                         |                              | -0.90      |
| Autumn 2011                            |                         |                              |            |                         |                              |            |
| Phoma leaf spot incidence              | 0.77                    | 0.53                         | -0.75      | 0.71                    | 0.70                         | -0.20      |
| Phoma leaf spot severity               |                         |                              | -0.81      |                         |                              | -0.75      |
| Autumn 2012                            |                         |                              |            |                         |                              |            |
| Phoma leaf spot incidence              | 0.67                    | 0.69                         | -0.67      | 0.71                    | 0.86                         | -0.81      |
| Phoma leaf spot severity               |                         |                              | -0.91      |                         |                              | -0.92      |
| Summer 2010                            |                         |                              |            |                         |                              |            |
| Stem canker incidence                  | 0.71                    | 0.69                         | -0.58      | 0.73                    | 0.71                         | -0.44      |
| Stem canker severity                   |                         |                              | -0.78      |                         |                              | -0.88      |
| Summer 2011                            |                         |                              |            |                         |                              |            |
| Stem canker incidence                  | 0.61                    | 0.54                         | -0.09      | 0.78                    | 0.53                         | -0.66      |
| Stem canker severity                   |                         |                              | -0.79      |                         |                              | -0.92      |
| Summer 2012                            |                         |                              |            |                         |                              |            |
| Stem canker incidence                  | 0.72                    | 0.56                         | -0.52      | 0.52                    | 0.61                         | -0.18      |
| Stem canker severity                   |                         |                              | -0.89      |                         |                              | -0.89      |
| Summer 2013                            |                         |                              |            |                         |                              |            |
| Stem canker incidence                  | 0.79                    | 0.64                         | -0.64      | 0.97                    | 0.69                         | -0.86      |
| Stem canker severity                   |                         |                              | -0.72      |                         |                              | -0.91      |

<sup>1</sup> Disease incidence: the percent of plants with disease symptoms (phoma leaf spot in the autumn, stem canker in the summer of the following year)

<sup>2</sup> Disease severity: the intensity of disease symptoms (phoma leaf spot in the autumn, stem canker in the summer of the following year)

<sup>3</sup> All plants: disease severity calculated for all observed plants per plot (n=30)

<sup>4</sup> Infected plants: disease severity calculated only for infected plants
